# Supplementary material for: Antibiotic Susceptibility Profiles and Resistance Mechanisms to β-Lactams and Polymyxins of Escherichia coli from Broilers Raised under Intensive and Extensive Production Systems
Source: MDPI journal article supplement (doi:10.3390/microorganisms10102044), 2022-10-16
Supplement: s1 [file s1]

**Table S1.** Primers used for DNA amplification

| Gene                                                         | Primer                             | Sequence (5'- 3')                                | [Primer]                   | Product (bp) | Annealing Temp. | References           |
|--------------------------------------------------------------|------------------------------------|--------------------------------------------------|----------------------------|--------------|-----------------|----------------------|
| CTX-M-1                                                      | MultiCTXMGP1_F<br>MultiCTXMGP1-2_R | TTAGGAARTGTGCCGCTGYA<br>CGATATCGTTGGTGGTRCCAT    | 0.4 $\mu$ M                | 688          | 60°C            | Dallenne et al, 2010 |
| CTX-M-2                                                      | MultiCTXMGP2_F<br>MultiCTXMGP1-2_R | CGTTAACGGCACGATGAC<br>CGATATCGTTGGTGGTRCCAT      | 0.2 $\mu$ M<br>0.4 $\mu$ M | 404          | 60°C            | Dallenne et al, 2010 |
| CTX-M-9                                                      | MultiCTXMGP_F<br>MultiCTXMGP_R     | TCAAGCCTGCCGATCTGGT<br>TGATTCTCGCCGCTGAAG        | 0.4 $\mu$ M                | 561          | 60°C            | Dallenne et al, 2010 |
| CTX-M-8/25                                                   | CTX-Mg8/25_F<br>CTX-Mg8/25_R       | AACRCRCAGACGCTCTAC<br>TCGAGCCGGAASGTGTAT         | 0.4 $\mu$ M                | 326          | 60°C            | Dallenne et al, 2010 |
| TEM                                                          | Primer TEM_F<br>Primer TEM_R       | CATTTCCGTGTCGCCCTTATTC<br>CGTTCATCCATAGTTGCCTGAC | 0.4 $\mu$ M                | 800          | 60°C            | Dallenne et al, 2010 |
| SHV                                                          | Primer SHV_F<br>Primer SHV_R       | AGCCGCTTGAGCAAATTAAAC<br>ATCCCGCAGATAAATCACCAC   | 0.4 $\mu$ M                | 713          | 60°C            | Dallenne et al, 2010 |
| OXA                                                          | Primer OXA_F<br>Primer OXA_R       | GGCACCAGATTCAACTTTCAAG<br>GACCCCAAGTTTCCTGTAAGTG | 0.4 $\mu$ M                | 564          | 60°C            | Dallenne et al, 2010 |
| ACC                                                          | MultiCaseACC_F<br>MultiCaseACC_R   | CACCTCCAGCGACTTGTTAC<br>GTTAGCCAGCATCACGATCC     | 0.2 $\mu$ M                | 346          | 60°C            | Dallenne et al, 2010 |
| FOX                                                          | MultiCaseFOX_F<br>MultiCaseFOX_R   | CTACAGTGCGGGTGGTTT<br>CTATTTGCGGCCAGGTGA         | 0.5 $\mu$ M                | 162          | 60°C            | Dallenne et al, 2010 |
| MOX; CMY-1, -8, -11;<br>-19                                  | MultiCaseMOX_F<br>MultiCaseMOX_R   | GCAACAACGACAATCCATCCT<br>GGGATAGGCGTAACTCTCCCAA  | 0.2 $\mu$ M                | 895          | 60°C            | Dallenne et al, 2010 |
| DHA                                                          | MultiCaseDHA_F<br>MultiCaseDHA_R   | TGATGGCACAGCAGGATATTC<br>GCTTTGACTCTTTCGGTATTCG  | 0.5 $\mu$ M                | 997          | 60°C            | Dallenne et al, 2010 |
| LAT-1; -3, BIL-1,<br>CMY-2 to -7, -12 to -<br>18, -21 to -23 | MultiCaseCIT_F<br>MultiCaseCIT_R   | CGAAGAGGCAATGACCAGAC<br>ACGGACAGGGTTAGGATAGY     | 0.2 $\mu$ M                | 538          | 60°C            | Dallenne et al, 2010 |
| ACT-1; MIR-1                                                 | MultiCaseEBC_F<br>MultiCaseEBC_R   | CGGTAAAGCCGATGTTGCG<br>AGCCTAACCCCTGATACA        | 0.2 $\mu$ M                | 683          | 60°C            | Dallenne et al, 2010 |

|       |                    |                                                 |        |      |      |                    |
|-------|--------------------|-------------------------------------------------|--------|------|------|--------------------|
| MCR-1 | MCR1_F<br>MCR1_R   | AGTCCGTTTGTCTTGTGGC<br>AGATCCTTGGTCTCGGCTTG     | 0.5 µM | 320  | 58°C | Rebelo et al, 2018 |
| MCR-2 | MCR2_F<br>MCR2_R   | CAAGTGTGTTGGTCGCAGTT<br>TCTAGCCCGACAAGCATACC    | 0.5 µM | 715  | 58°C | Rebelo et al, 2019 |
| MCR-3 | MCR3_F<br>MCR3_R   | AAATAAAAATTGTTCCGCTTATG<br>AATGGAGATCCCCGTTTTT  | 0.5 µM | 929  | 58°C | Rebelo et al, 2020 |
| MCR-4 | MCR4_F<br>MCR4_R   | TCACTTTCATCACTGCGTTG<br>TTGGTCCATGACTACCAATG    | 0.5 µM | 1116 | 58°C | Rebelo et al, 2021 |
| MCR-5 | MCR5_F<br>MCR5_R   | ATGCGGTTGTCTGCATTTATC<br>TCATTGTGGTTGTCCTTTTCTG | 0.5 µM | 1644 | 58°C | Lu X et al, 2017   |
| Int1  | IntI1_F<br>IntI1_R | GGTCAAGGATCTGGATTTCG<br>ACATGCGTGTAATCATCGTC    | 0.4 µM | 436  | 60°C | Kargar et al, 2014 |
| Int2  | IntI2_F<br>IntI2_R | CACGGATATGCGACAAAAGG<br>TGTAGCAAACGAGTGACGAAATG | 0.4 µM | 788  | 60°C | Kargar et al, 2014 |
| Int3  | IntI3_F<br>IntI3_R | AGTGGGTGGCGAATGAGTG<br>AGTGGGTGGCGAATGAGTG      | 0.4 µM | 600  | 60°C | Kargar et al, 2014 |

**Table S2.** Primers for Sanger sequencing.

| Gene       | Primer                 | Sequence                                       | [Primer]    | Product (bp) | Annealing Temp. | Reference            |
|------------|------------------------|------------------------------------------------|-------------|--------------|-----------------|----------------------|
| TEM        | FIN<br>DEB             | ATTCTTGAAGACGAAAGGGC<br>ATGAGTAAACTTGGTCTGAC   | 0.4 $\mu$ M | 1091         | 54°C            | Caniça et al, 1997   |
| SHV        | SHVF149P<br>SHVR1059   | CGCTTCITTA CTG CCTT TA<br>TTAGCGTTGCCAGTGCTC   | 0.5 $\mu$ M | 911          | 56°C            | Rasheed et al, 1997  |
| CMY        | CMYG2F<br>CMYG2R       | TTACGGA ACTGATTT CATG<br>TCGTCAGTTATTGCAGC     | 0.5 $\mu$ M | 1143         | 56°C            | Manageiro, 2011      |
| AmpC       | Int-B2<br>Int-HN       | TTCCTGATGATCGTTCTGCC<br>AAAAGCGGAGAAAAGGTCCG   | 0.5 $\mu$ M | 1315         | 57°C            | Mammeri et al, 2006  |
| CTX-M-1    | CTXM15F<br>CTXM1R      | AGAATAAGGAATCCCATGGTT<br>CCGTTTCCGCTATTACAA    | 0.5 $\mu$ M | 903          | 53°C            | Mendonça et al, 2007 |
| CTX-M-9    | CTXM9F<br>CTXMG9R2     | ATGGTGACAAAGAGAGTGCAAC<br>AGTTACAGCCCTTCGGCGAT | 0.5 $\mu$ M | 878          | 55°C            | Cottel et al, 2012   |
| CTX-M-8/25 | CTXM8/25F<br>CTXM8/25R | GATRYTAATGACRACRGCTT<br>TGGGTGAAGTAAGTSACCAG   | 0.5 $\mu$ M | 777          | 57°C            | This study           |

<sup>a</sup> **Y**=T or C; **R**=A or G; **S**=G or C; **D**=A or G or T

**F**, forward; **R**, reverse

**Table S3.** Prevalence of multidrug resistance patterns observed in *E. coli* isolates from broilers raised under intensive (n=77) and extensive production systems (n=42).

| Multidrug resistance patterns   | Extensive system |      | Intensive system |      | Total |      |
|---------------------------------|------------------|------|------------------|------|-------|------|
|                                 | N                | %    | N                | %    | N     | %    |
| AMP-CIP-NAL-TET                 | 7                | 16.6 | 2                | 2.6  | 9     | 7.6  |
| AMP-CIP-SMX-TMP                 | 1                | 2.4  | 0                | 0    | 1     | 0.8  |
| AMP-CIP-NAL-SMX                 | 1                | 2.4  | 1                | 1.3  | 2     | 1.7  |
| AMP-SMX-TET-TMP                 | 2                | 4.8  | 2                | 2.6  | 4     | 3.4  |
| AMP-CIP-GEN-NAL                 | 1                | 2.4  | 0                | 0    | 1     | 0.8  |
| AMP-CHL-CIP-NAL                 | 0                | 0    | 1                | 1.3  | 1     | 0.8  |
| CIP-GEN-NAL-SMX                 | 1                | 2.4  | 0                | 0    | 1     | 0.8  |
| CIP-NAL-SMX-TET                 | 2                | 4.8  | 1                | 1.3  | 3     | 2.5  |
| GEN-SMX-TET-TMP                 | 0                | 0    | 1                | 1.3  | 1     | 0.8  |
| AMP-CIP-NAL-SMX-TET             | 2                | 4.8  | 1                | 1.3  | 3     | 2.5  |
| AMP-CIP-NAL-SMX-TMP             | 1                | 2.4  | 1                | 1.3  | 2     | 1.7  |
| AMP-CHL-CIP-NAL-SMX             | 0                | 0    | 2                | 2.6  | 2     | 1.7  |
| AMP-CIP-NAL TET-TMP             | 1                | 2.4  | 3                | 3.9  | 4     | 3.4  |
| AMP-CIP-SMX-TET-TMP             | 0                | 0    | 1                | 1.3  | 1     | 0.8  |
| AMP-CHL-CIP-NAL-TET             | 0                | 0    | 1                | 1.3  | 1     | 0.8  |
| AMP-AZI-CIP-NAL-TMP             | 0                | 0    | 1                | 1.3  | 1     | 0.8  |
| AMP-CIP-NAL-SMX-TET-TMP         | 8                | 19   | 7                | 9.1  | 15    | 12.6 |
| AMP-CHL-CIP-NAL-SMX-TMP         | 1                | 2.4  | 0                | 0    | 1     | 0.8  |
| AMP-CHL-CIP-GEN-NAL-SMX         | 0                | 0    | 1                | 1.3  | 1     | 0.8  |
| AMP-CHL-CIP-NAL-SMX-TET         | 0                | 0    | 1                | 1.3  | 1     | 0.8  |
| AMP-AZI-CHL-NAL-SMX-TMP         | 0                | 0    | 1                | 1.3  | 1     | 0.8  |
| AMP-AZI-CIP-NAL-SMX-TET-TMP     | 0                | 0    | 1                | 1.3  | 1     | 0.8  |
| AMP-CHL-CIP-NAL-SMX-TET-TMP     | 2                | 4.8  | 9                | 11.7 | 11    | 9.2  |
| AMP-AZI-CIP-GEN-NAL-SMX-TET-TMP | 1                | 2.4  | 4                | 5.2  | 5     | 4.2  |
| AMP-FOT-TAZ-CIP-SMX-FEP         | 0                | 0    | 1                | 1.3  | 1     | 0.8  |
| AMP-FOT-TAZ-CHL-GEN-SMX-FEP     | 0                | 0    | 1                | 1.3  | 1     | 0.8  |
| AMP-FOT-TAZ-CHL-CIP-NAL-SMX-FEP | 0                | 0    | 1                | 1.3  | 1     | 0.8  |
| AMP-FOT-TAZ-CHL-CIP-SMX-TET-FEP | 0                | 0    | 2                | 2.6  | 2     | 1.7  |
| AMP-FOT-TAZ-CIP-SMX-TMP-FEP-FOX | 0                | 0    | 1                | 1.3  | 1     | 0.8  |
| AMP-FOT-TAZ-CHL-SMX-TET-FEP-FOX | 0                | 0    | 1                | 1.3  | 1     | 0.8  |
| AMP-FOT-TAZ-CIP-NAL-SMX-TMP-FEP | 1                | 2.4  | 1                | 1.3  | 2     | 1.7  |

|                                                 |   |     |    |     |    |     |
|-------------------------------------------------|---|-----|----|-----|----|-----|
| AMP-FOT-TAZ-CIP-NAL-SMX-TET-FEP                 | 2 | 4.8 | 2  | 2.6 | 4  | 3.4 |
| AMP-FOT-TAZ-CIP-NAL-SMX-TET-FEP-FOX             | 0 | 0   | 1  | 1.3 | 1  | 0.8 |
| AMP-FOT-TAZ-CIP-NAL-SMX-TMP-FEP-FOX             | 0 | 0   | 1  | 1.3 | 1  | 0.8 |
| AMP-FOT-TAZ-CIP-NAL-SMX-TET-TMP-FEP             | 3 | 7.1 | 1  | 1.3 | 4  | 3.4 |
| AMP-FOT-TAZ-CHL-CIP-NAL-SMX-TET-FEP             | 1 | 2.4 | 10 | 13  | 11 | 9.2 |
| AMP-AZI-FOT-TAZ-CHL-CIP-SMX-TET-TMP-FEP         | 0 | 0   | 1  | 1.3 | 1  | 0.8 |
| AMP-FOT-TAZ-CHL-CIP-NAL-SMX-TET-FEP-FOX         | 0 | 0   | 1  | 1.3 | 1  | 0.8 |
| AMP-FOT-TAZ-CIP-NAL-SMX-TMP-FEP-FOX-ETP         | 0 | 0   | 1  | 1.3 | 1  | 0.8 |
| AMP-FOT-TAZ-CHL-CIP-NAL-SMX-TET-TMP-FEP         | 0 | 0   | 2  | 2.6 | 2  | 1.7 |
| AMP-FOT-TAZ-CHL-CIP-COL-NAL-SMX-TET-FEP         | 0 | 0   | 1  | 1.3 | 1  | 0.8 |
| AMP-AZI-FOT-TAZ-CIP-NAL-SMX-TET-TMP-FEP         | 1 | 2.4 | 0  | 0   | 1  | 0.8 |
| AMP-AZI-FOT-TAZ-CHL-CIP-NAL-SMX-TET-TMP-FEP     | 2 | 4.8 | 0  | 0   | 2  | 1.7 |
| AMP-AZI-FOT-TAZ-CHL-CIP-GEN-NAL-SMX-TET-TMP-FEP | 1 | 2.4 | 5  | 6.5 | 6  | 5   |
| AMP-FOT-TAZ-CHL-CIP-GEN-NAL-SMX-TET-TMP-FEP-FOX | 0 | 0   | 1  | 1.3 | 1  | 0.8 |

AMP, Ampicilin; AZI, Azithromycin; FOT, Cefotaxime; TAZ, Ceftazidime; CHL, Chloramphenicol; CIP, Ciprofloxacin; GEN, Gentamicin; NAL, Nalidixic Acid; SMX, Sulphamethoxazole; TET, Tetracycline; TMP, Trimethoprim; FEP, Cefepime; FOX, Cefoxitin
